# Supplementary material
Source: publisher figshare collection journal article supplement (https://sage.figshare.com/ndownloader/files/13182937)
Supplement: Supplementary file 1 [file 13182937]

## Appendix A

### Interview schedule

|          |                                                                                                                                                                            |                                 |                                      |                                     |                         |
|----------|----------------------------------------------------------------------------------------------------------------------------------------------------------------------------|---------------------------------|--------------------------------------|-------------------------------------|-------------------------|
| <b>Q</b> |                                                                                                                                                                            |                                 |                                      |                                     |                         |
| <b>1</b> | <b>Site</b>                                                                                                                                                                |                                 |                                      |                                     |                         |
|          | State Hospital<br>(EDH)                                                                                                                                                    | State Clinic<br>(MW)            | State Clinic<br>(BP)                 | Private<br>Practice<br>(NP)         | Private Practice (KMGX) |
| <b>2</b> | <b>Age (y)</b>                                                                                                                                                             |                                 |                                      |                                     |                         |
|          | 18 - 34                                                                                                                                                                    | 35 – 49                         | 50 - 64                              | ≥ 65                                |                         |
| <b>3</b> | <b>Sex</b>                                                                                                                                                                 |                                 |                                      |                                     |                         |
|          | Male                                                                                                                                                                       | Female                          |                                      |                                     |                         |
| <b>4</b> | <b>Race</b>                                                                                                                                                                |                                 |                                      |                                     |                         |
|          | Black                                                                                                                                                                      | White                           | Coloured                             | Indian                              | Other:                  |
| <b>5</b> | <b>Home Language</b>                                                                                                                                                       |                                 |                                      |                                     |                         |
|          | Afrikaans                                                                                                                                                                  | English                         | Xhosa                                | Other:                              |                         |
| <b>6</b> | <b>What has your main work / income been in past 12 months?</b>                                                                                                            |                                 |                                      |                                     |                         |
|          | Mainly<br>unemployed                                                                                                                                                       | Mainly<br>employed              | DG or other<br>Pension               | Student                             | Other:                  |
| <b>7</b> | <b>Education</b> (highest level <i>successfully completed</i> according to patient)                                                                                        |                                 |                                      |                                     |                         |
|          | Grade 7 (Std.<br>5) or less                                                                                                                                                | Grade 8 to 12<br>(Std. 6 to 10) | ≤ 2 years<br>University /<br>College | ≥ 3 years<br>University<br>/College | Other:                  |
| <b>8</b> | <b>Total monthly household income</b> (patient's estimation) – only if patient agrees to disclose: (Yes / No) [categories similar to Statistics SA Quintiles of 2005/2006] |                                 |                                      |                                     |                         |
|          | R 0 - R1 000                                                                                                                                                               | R 1 001 - R 2<br>000            | R 2 001 - R3<br>000                  | R 3 001 -<br>R7 500                 | R7 501 or more          |

|      |                                                                                                                                                                            |                                            |                                                  |                                                                     |                                                                       |
|------|----------------------------------------------------------------------------------------------------------------------------------------------------------------------------|--------------------------------------------|--------------------------------------------------|---------------------------------------------------------------------|-----------------------------------------------------------------------|
| 9    | <b>To which of the following do you have regular access in the place that you live?</b>                                                                                    |                                            |                                                  |                                                                     |                                                                       |
|      | Television<br>(working order)                                                                                                                                              | Radio (working order)                      | Newspaper (on most of the days)                  | Magazine (weekly or monthly) e.g. You, Huisgenoot, Drum, Bona, etc. |                                                                       |
| 10   | <b>Did you consult any of the following practitioners for mental problems in the past 12 months?</b>                                                                       |                                            |                                                  |                                                                     |                                                                       |
|      | <i>Specify (more than one if necessary)</i>                                                                                                                                |                                            |                                                  |                                                                     |                                                                       |
| 11   | African culture-aligned                                                                                                                                                    | Complementary / alternative                | Religion-aligned                                 | Other                                                               | None (Continue to Q 21)                                               |
|      | <b>If you answered yes to question 10, what was your reason for choosing this particular practitioner?</b>                                                                 |                                            |                                                  |                                                                     |                                                                       |
| 11.1 | Cultural belief                                                                                                                                                            | Religious belief                           | Family / friends' recommendation                 | Personal preference                                                 | Response to advertisement                                             |
| 11.2 | Other (describe):                                                                                                                                                          |                                            |                                                  |                                                                     |                                                                       |
| 12   | <b>If you answered YES to question 10, how much money did you spend on the consultation/s and treatment/s you received from this practitioner over the past 12 months?</b> |                                            |                                                  |                                                                     |                                                                       |
|      | R 500 or less                                                                                                                                                              | R501 - R1 000                              | R1 001 – R 2000                                  | R2001 - R3000                                                       | R3 001 or more                                                        |
| 13   | <b>What treatment was recommended by the practitioner? (specify more than one if necessary)</b>                                                                            |                                            |                                                  |                                                                     |                                                                       |
|      |                                                                                                                                                                            |                                            |                                                  |                                                                     |                                                                       |
| 14   | <b>How did you use or take the treatment? (Specify more than one route of administration if necessary)</b>                                                                 |                                            |                                                  |                                                                     |                                                                       |
|      | Oral<br>(swallowing, chewing or buccal)                                                                                                                                    | Rectal (enema, suppository, rectal lavage) | Inhalation, “steaming”, sniffing or nasal lavage | Parenteral (IM, IV or other injection)                              | External application on skin (lotions, creams, mud, special mixtures) |
| 14.1 |                                                                                                                                                                            |                                            |                                                  |                                                                     |                                                                       |

|      |                                                                                                                                                                  |                                                                                                                                      |                                         |                             |                   |
|------|------------------------------------------------------------------------------------------------------------------------------------------------------------------|--------------------------------------------------------------------------------------------------------------------------------------|-----------------------------------------|-----------------------------|-------------------|
| 14.2 | Scarification<br>& tattooing                                                                                                                                     | Ritual: cultural<br>or religious<br>treatment ritual<br>(including<br>prayer, laying<br>of hands,<br>“blessings”,<br>exorcism, etc.) | Other (describe):                       |                             |                   |
|      |                                                                                                                                                                  |                                                                                                                                      |                                         |                             |                   |
| 15   | <b>Do you think the practitioner’s treatment made you worse, better, or had no effect?</b>                                                                       |                                                                                                                                      |                                         |                             |                   |
|      | Worse                                                                                                                                                            | Better                                                                                                                               | No effect                               | Other effect (describe):    |                   |
| 16   | <b>Did you use the practitioner’s treatment or prescription exactly the way you were advised to use it?</b>                                                      |                                                                                                                                      |                                         |                             |                   |
|      | Yes, I used it<br>exactly                                                                                                                                        | No, I did not<br>use it at all                                                                                                       | I used it, but<br>with<br>modifications | Other (describe):           |                   |
| 17   | <b>Were you mistreated, assaulted or abused in any way during treatment by the practitioner (specify)?</b>                                                       |                                                                                                                                      |                                         |                             |                   |
|      | Yes                                                                                                                                                              | No                                                                                                                                   | If yes, give details:                   |                             |                   |
| 18   | <b>If the practitioner gave your problem a diagnosis or a name, what was it?</b>                                                                                 |                                                                                                                                      |                                         |                             |                   |
|      | No Dx or<br>name                                                                                                                                                 | Can't remember                                                                                                                       | Dx or name (specify):                   |                             |                   |
| 19   | <b>What did the practitioner tell you about the regular medication or treatment you may be getting from a medical doctor, specialist, nurse or psychologist?</b> |                                                                                                                                      |                                         |                             |                   |
|      | Continue Rx<br>as usual                                                                                                                                          | Change dose or<br>Interrupt &<br>restart later                                                                                       | Permanently<br>stop Rx                  | No advice<br>on usual<br>Rx | Other (describe): |

|    |                                                                                                                                                                                           |                                                                                                                                                                     |                                                                                                                                                                                                                                                                                                                                                                                                                                                           |                                                                                                                                                                                                                                      |                   |
|----|-------------------------------------------------------------------------------------------------------------------------------------------------------------------------------------------|---------------------------------------------------------------------------------------------------------------------------------------------------------------------|-----------------------------------------------------------------------------------------------------------------------------------------------------------------------------------------------------------------------------------------------------------------------------------------------------------------------------------------------------------------------------------------------------------------------------------------------------------|--------------------------------------------------------------------------------------------------------------------------------------------------------------------------------------------------------------------------------------|-------------------|
| 20 | Of all treatments you have ever had for your illness (including traditional or alternative practitioner, regular doctor, specialist, nurse, psychologist), which one helped you the most? |                                                                                                                                                                     |                                                                                                                                                                                                                                                                                                                                                                                                                                                           |                                                                                                                                                                                                                                      |                   |
|    | Regular medical Rx                                                                                                                                                                        | Traditional / Alternative Rx                                                                                                                                        | Equally helpful                                                                                                                                                                                                                                                                                                                                                                                                                                           | None helped                                                                                                                                                                                                                          | Other (describe): |
| 21 | Would you visit a traditional or alternative healer in future should you develop mental problems?                                                                                         |                                                                                                                                                                     |                                                                                                                                                                                                                                                                                                                                                                                                                                                           |                                                                                                                                                                                                                                      |                   |
|    | Yes, definitely                                                                                                                                                                           | No, definitely not                                                                                                                                                  | Maybe; not sure                                                                                                                                                                                                                                                                                                                                                                                                                                           | Other (describe):                                                                                                                                                                                                                    |                   |
| 22 | Categories of practitioners:                                                                                                                                                              | <u>African Culture-Aligned Practitioner:</u><br>Witchdoctor (TH) (iGqirha), Herbalist (iXhwele), (uMthandazeli), or other culture-aligned practitioner ("emntwini") | <u>Complementary and Alternative Medicine Practitioner: (CAMP)</u><br>Homeopathy, Chiropractor, Reflexology, Aromatherapy, Acupuncture, Magnetic Therapy, Naturopathy, Herbalism, Chinese / Ayurvedic / Unani medicines, Yoga & Meditation (as treatment), Hypnosis (by non-psychologist), non-medical diet based therapy, Tarot card, Palmistry, Clairvoyant, Occult practitioner, Past lives therapist, Radionics, Dianetics & Scientology, Reiki, etc. | <u>Religion-Aligned Practitioner: (RAH)</u><br>Priest, pastor, minister of religion, Imam, Rabbi or an official from any formal organised religion who uses a religious framework for treatment practice, Umthandazel (faith healer) |                   |
|    |                                                                                                                                                                                           |                                                                                                                                                                     |                                                                                                                                                                                                                                                                                                                                                                                                                                                           |                                                                                                                                                                                                                                      |                   |
